# Supplementary material for: One-step strategy to a three-dimensional NiS-reduced graphene oxide hybrid nanostructure for high performance supercapacitors
Source: Royal Society of Chemistry journal article supplement (doi:10.1039/c5ra02058a), 2015-01-01
Supplement: c5ra02058a1.pdf [file c5ra02058a1.pdf]

### Supporting information

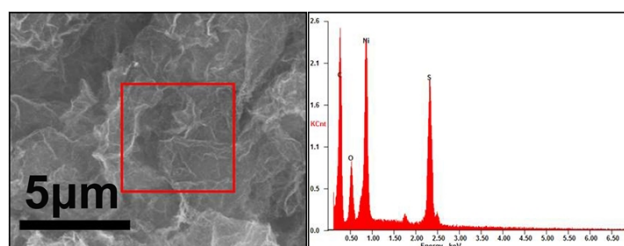

Fig. S1 The EDS measurement of self-assembled NiS-rGO aerogel.

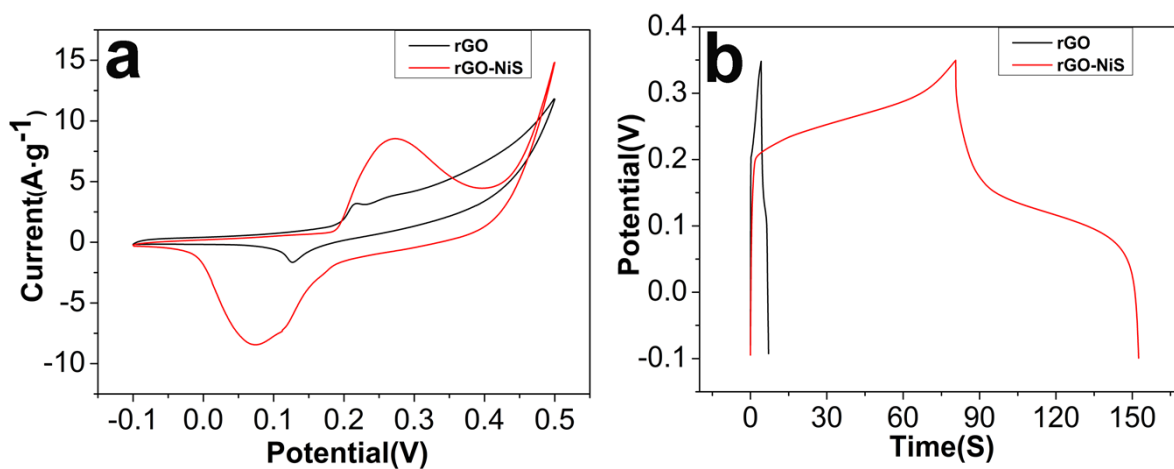

Fig. S2 CV curves at 5 mV·s<sup>-1</sup> (a) and charge and discharge profiles at an current density of 5 A·g<sup>-1</sup> (b) of pure rGO and NiS-rGO aerogel separately.

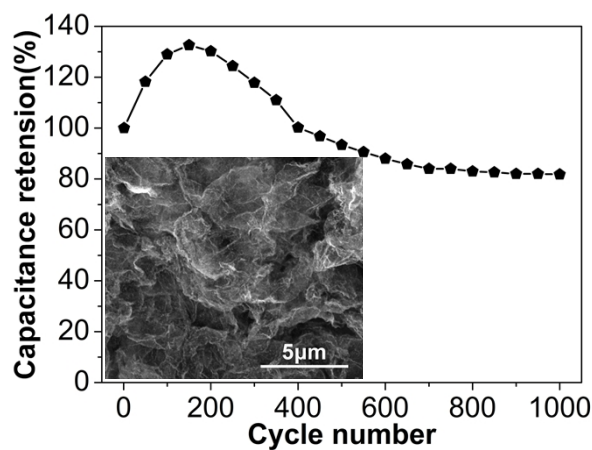

Fig. S3 The cycling performance of NiS-rGO nanocomposite at a current density of 2 A·g<sup>-1</sup>.
